# Supplementary material for: Mass Spectrometric Identification of BSA Covalently Captured onto a Chip for Atomic Force Microscopy
Source: MDPI journal article supplement (doi:10.3390/ijms24108999), 2023-05-19
Supplement: s1 [file s1]

## **Supplementary Material to**

# **Mass Spectrometric Identification of BSA Covalently Captured onto a Chip for Atomic Force Microscopy**

by

**Arina I. Gordeeva, Anastasia A. Valueva, Maria O. Ershova, Elizaveta E. Rybakova, Ivan D. Shumov, Andrey F. Kozlov, Vadim S. Ziborov, Maria G. Zavialova, Victor G. Zgoda, Yuri D. Ivanov, Alexander I. Archakov and Tatyana O. Pleshakova\***

Institute of Biomedical Chemistry (IBMC), 119121, Moscow, Russia

\*Correspondence: [topleshakova@yandex.ru](mailto:topleshakova@yandex.ru); Tel.: +7 (499) 246-3761

In order to analyze the data obtained, the composition of peptides in each peptoset, obtained using either DSP (peptoset 2\_2) or SuccBB (peptoset 3\_2) crosslinker, or  $10^{-7}$  M BSA solution is listed in Table S1.

**Table S1.** Results of MALDI-MS analysis obtained for peptoset 3\_2, peptoset 2\_2, and  $10^{-7}$  M protein solution: m/z values of the identified peptides.

| Peptoset 3_2 | Peptoset 2_2 | $10^{-7}$ M BSA Solution |
|--------------|--------------|--------------------------|
| 665.3287     | 689.3729     | 665.3287                 |
| 689.3729     | 927.49344    | 689.3729                 |
| 712.3736     | 1163.6306    | 927.4934                 |
| 818.4254     | 1479.7954    | 1163.6306                |
| 922.488      | 1567.7427    | 1249.6211                |
| 927.49344    | 1955.9379    | 1283.7106                |
| 1050.4924    |              | 1439.8117                |
| 1249.6211    |              | 1479.7954                |
| 1305.7161    |              | 1567.7427                |
| 1479.7954    |              | 1639.9377                |
| 1511.8427    |              | 1955.9379                |
| 1567.7427    |              | 2045.0279                |
| 1639.9377    |              |                          |
| 1888.9268    |              |                          |

In order to additionally confirm the identification of the protein, MS/MS analysis of BSA peptides was performed. Figure S1 displays MS/MS spectra obtained upon analysis of  $10^{-7}$  M BSA solution. Mass spectra of two BSA peptide precursor ions YLYEIAR (Figure S1a) and KVPQVSTPTLVEVSR (Figure S1b) are shown. The same peptides have been identified in the case of analysis of peptide eluates from SuccBB-activated AFM chips (see Table S1 above).

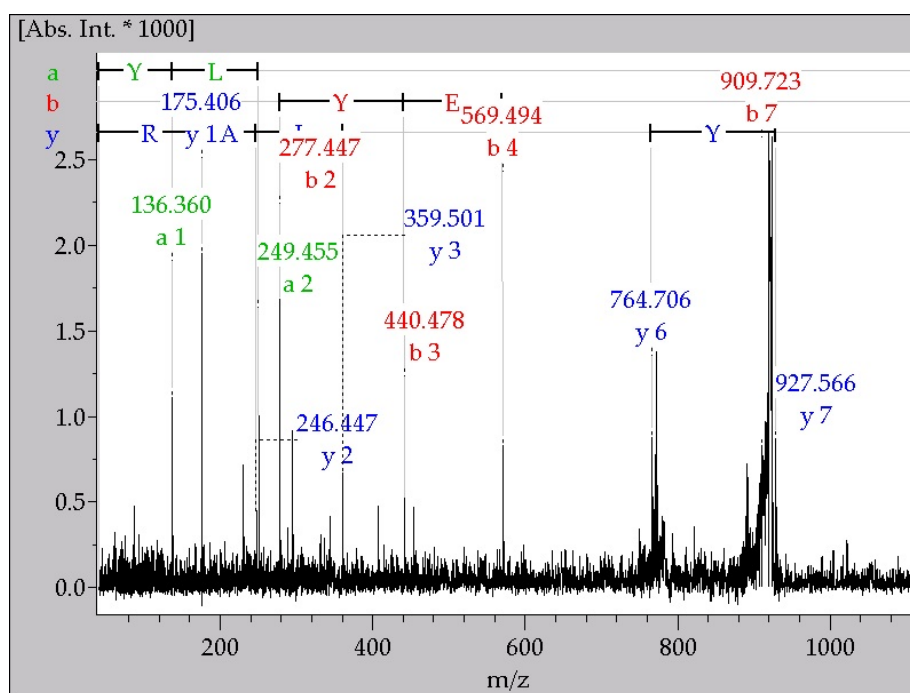

(a)

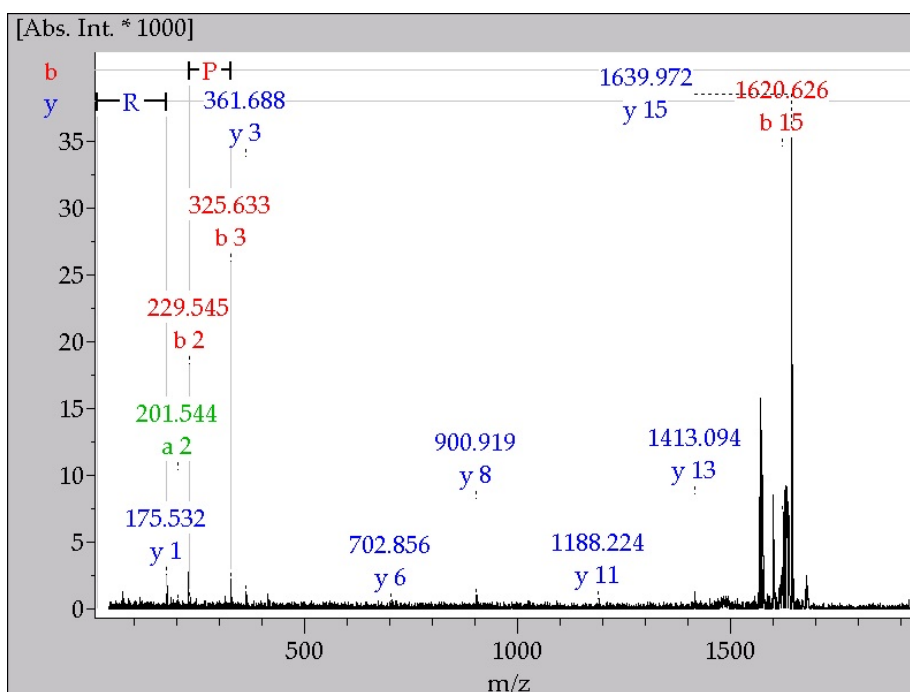

(b)

**Figure S1.** MALDI-TOF/TOF MS/MS spectrum of BSA molecular ions with amino acid sequence YLYEIAR and m/z 927.49344 (a) and with amino acid sequence KVPQVSTPTLVEVSR and m/z 1639.9377 (b). Coloured symbols indicate peaks, corresponding to Y-, a-, and b-ions, which result from the fragmentation of this structure (marked in blue, green, and red, respectively).
